# Supplementary material
Source: bioRxiv or medRxiv preprint supplement (https://www.biorxiv.org/highwire/filestream/83669/field_highwire_adjunct_files/0/272120-1.pdf)

Wild Type

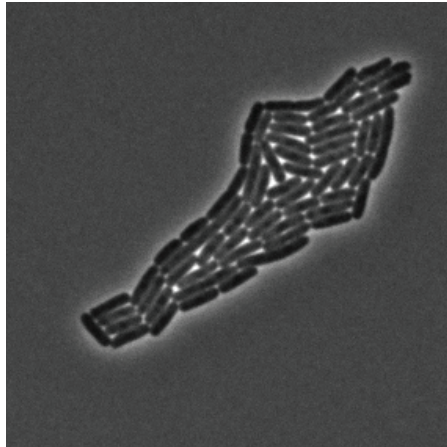

$\Delta lon$

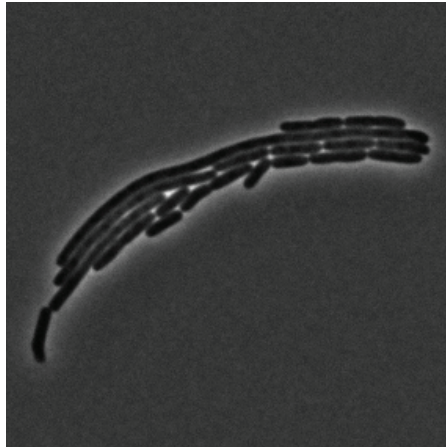

CRISPRi knockdown of *lon*

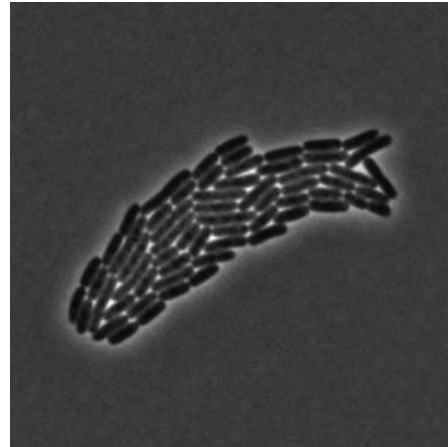

Supplement: Supplementary file [file 272120-1.pdf]
